# Supplementary material for: Fabrication of water-dispersible and highly conductive PSS-doped PANI/graphene nanocomposites using a high-molecular weight PSS dopant and their application in H2S detection
Source: Royal Society of Chemistry journal article supplement (doi:10.1039/c4nr04413d), 2014-11-06
Supplement: c4nr04413d1.pdf [file c4nr04413d1.pdf]

Supplementary Information for:

**Fabrication of water-dispersible and highly  
conductive PSS-doped PANI/graphene  
nanocomposites using high-molecular weight  
PSS dopant and their application to H<sub>2</sub>S  
detection**

**Sunghun Cho,<sup>a</sup> Jun Seop Lee,<sup>a</sup> Jaemoon Jun,<sup>a</sup> Sung Gun Kim<sup>a</sup> and Jyongsik Jang\*,<sup>a</sup>**

<sup>a</sup>Program of Chemical Convergence for Energy and Environment (C2E2), School of  
Chemical and Biological Engineering, College of Engineering, Seoul National University,  
Shinlimdong 56-1, Seoul 151-742, Korea.

\*E-mail: jsjang@plaza.snu.ac.kr

Tel.: +82-2-880-7069

Fax: +82-2-888-1604

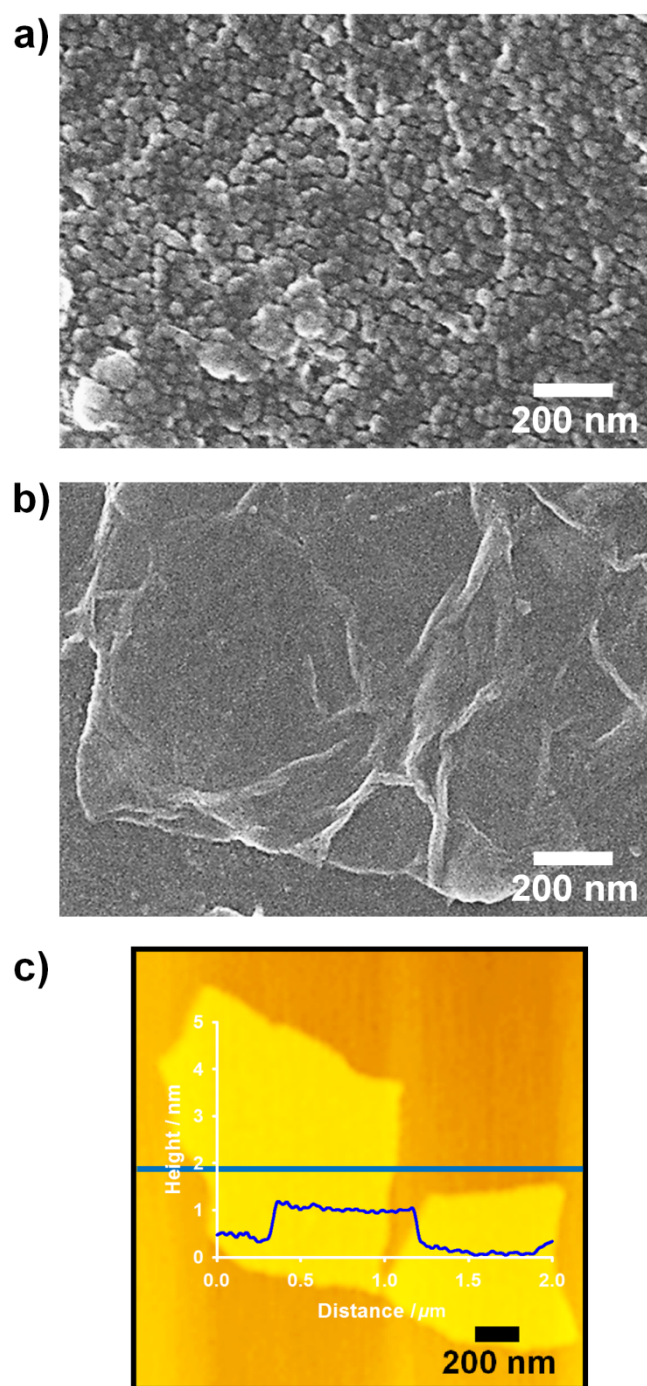

**Figure S1.** FE-SEM images of (a) PSS-doped PANI/graphene nanocomposite with 30 wt% graphene and (b) graphene sheet. Magnifications:  $\times 80\text{k}$  (a, b). (c) AFM image of graphene sheet.

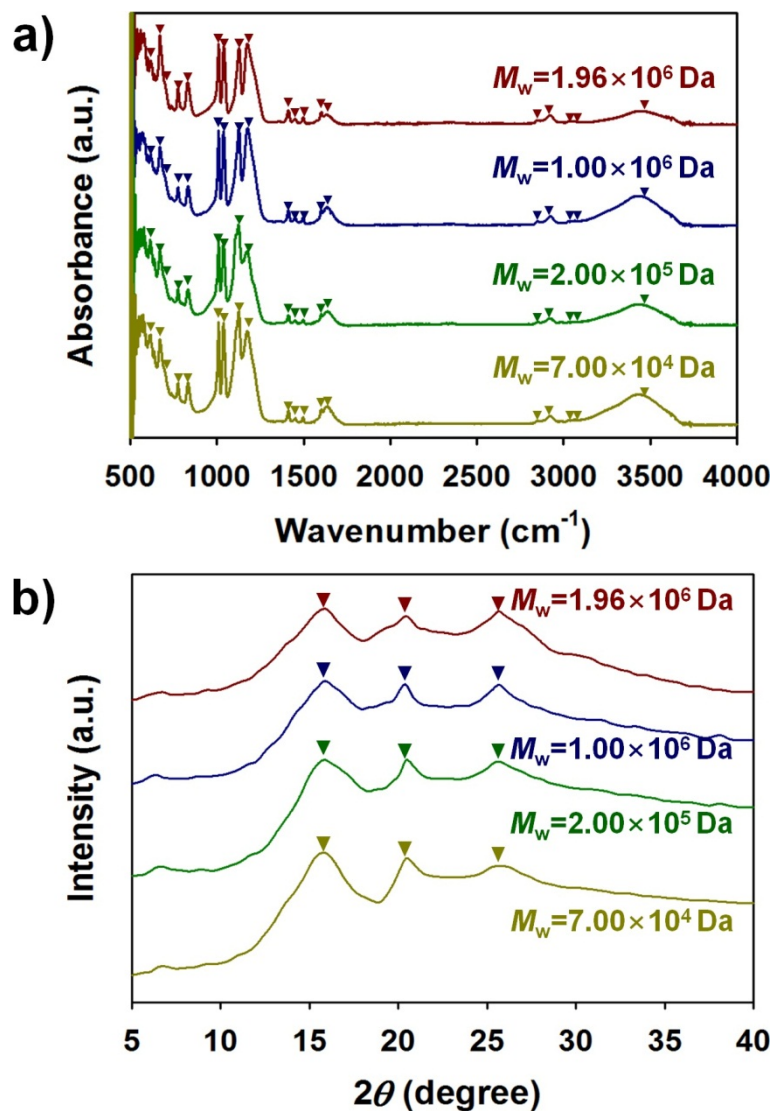

**Figure S2.** (a) FT-IR spectra of PSS having different  $M_w$ . (b) XRD spectra of PSS-doped PANI polymerized with different  $M_w$  of PSS at a polymerization temperature of  $-50^\circ\text{C}$ . All samples were polymerized at the  $w_{\text{PSS}}/w_{\text{ANI}}$  ratio of 10.

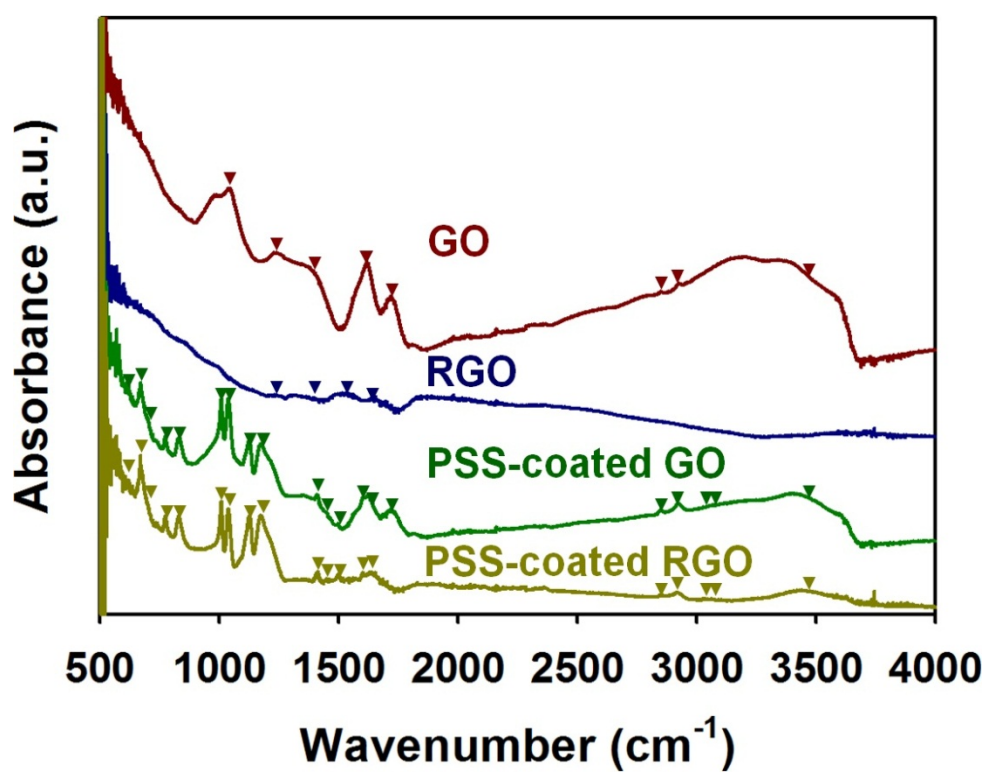

**Figure S3.** (a) FT-IR spectra of GO, RGO, PSS-coated GO, and PSS-coated RGO.

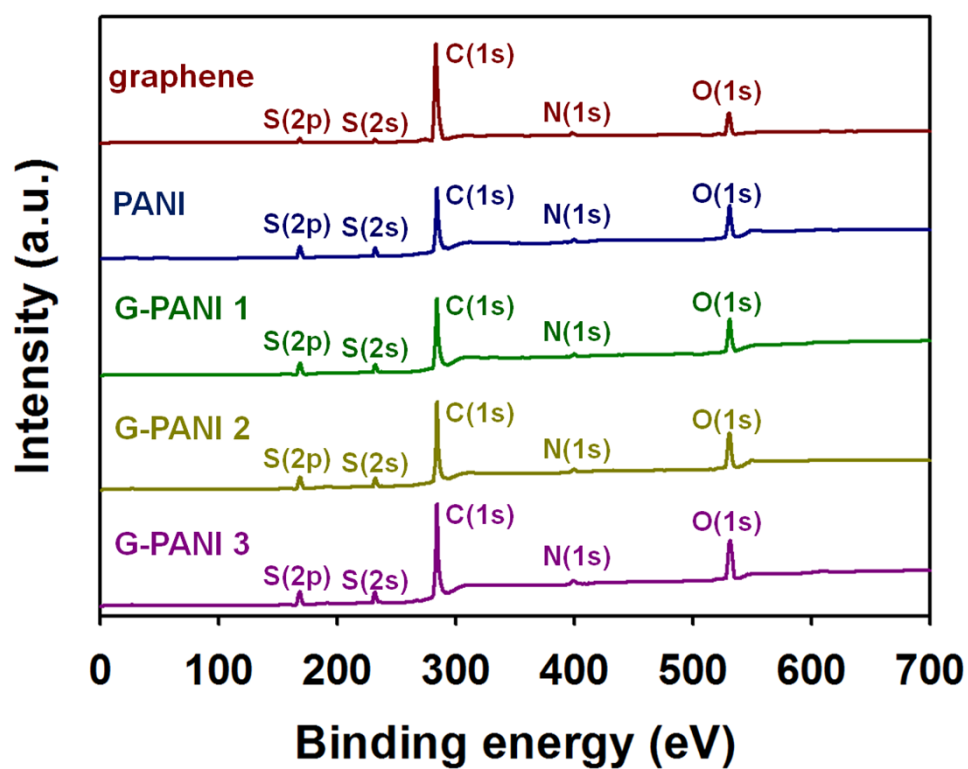

**Figure S4.** Fully scanned spectra of PSS-doped PANI/graphene nanocomposites.

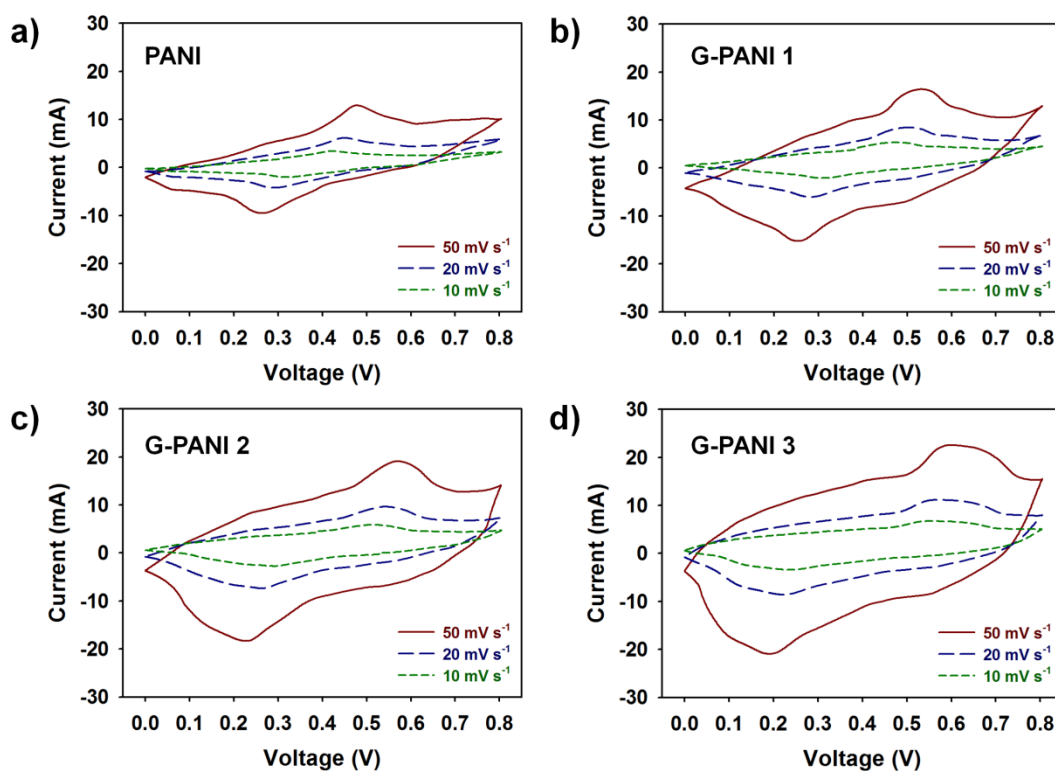

**Figure S5.** Cyclic voltammograms of (a) pristine PSS-doped PANI, (b) G-PANI 1 (with 10 wt% graphene), (c) G-PANI 2 (with 20 wt% graphene), and (d) G-PANI 3 (with 30 wt% graphene) in a 0.5M H<sub>2</sub>SO<sub>4</sub> electrolyte at different scan rates (10, 20, and 50 mV s<sup>-1</sup>).

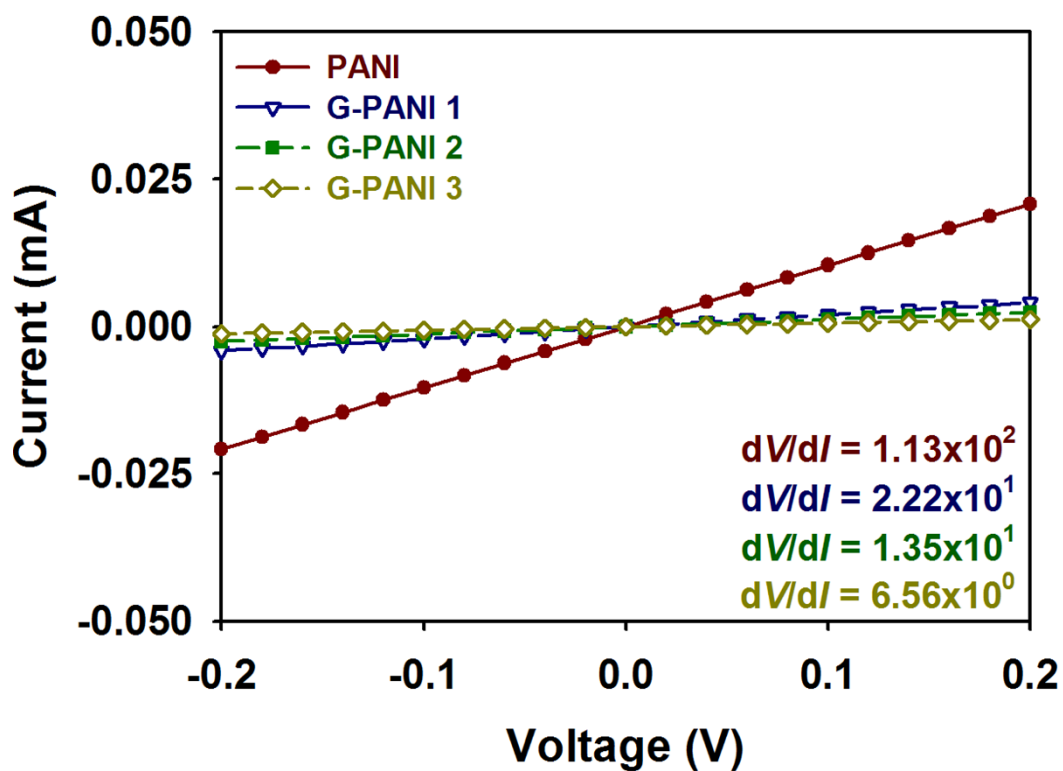

**Figure S6.**  $I$ - $V$  characteristics of PSS-doped PANI/graphene nanocomposites with thickness of 5  $\mu\text{m}$  integrated in the sensor substrate at a scan rate of 20  $\text{mV s}^{-1}$ .
